# Supplementary material for: Hepatic stellate cell hypertrophy is associated with metabolic liver fibrosis
Source: PubMed Central journal article supplement (PMC7052210; doi:10.1038/s41598-020-60615-0), 2020-03-02
Supplement: 41598_2020_60615_MOESM1_ESM.pdf [file 41598_2020_60615_MOESM1_ESM.pdf]

## **Supplementary data**

### **Hepatic stellate cell hypertrophy is associated with metabolic liver fibrosis**

Céline Hoffmann, Nour El Houda Djerir, Anne Danckaert, Julien Fernandes, Pascal Roux, Christine Charrueau, Anne-Marie Lachagès, Frédéric Charlotte, Isabelle Brocheriou, Karine Clément, Judith Aron-Wisnewsky, Fabienne Foufelle, Vlad Ratziu, Bernard Hainque, Dominique Bonnefont-Rousselot, Pascal Bigey, Virginie Escriou

## Supplementary Figure S1

### A) Microscopic images of primary HSC

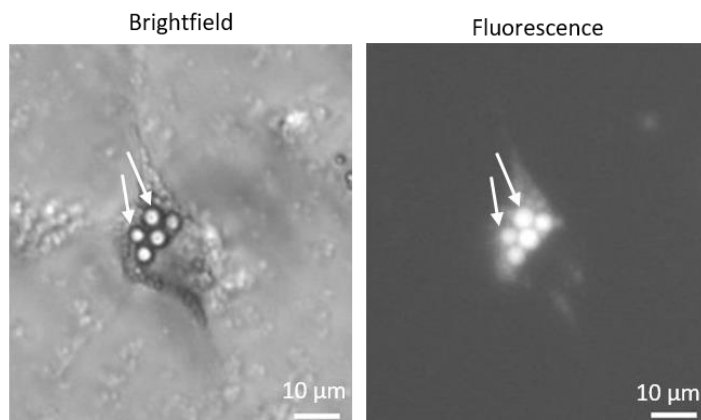

### B) Area of spectral acquisition

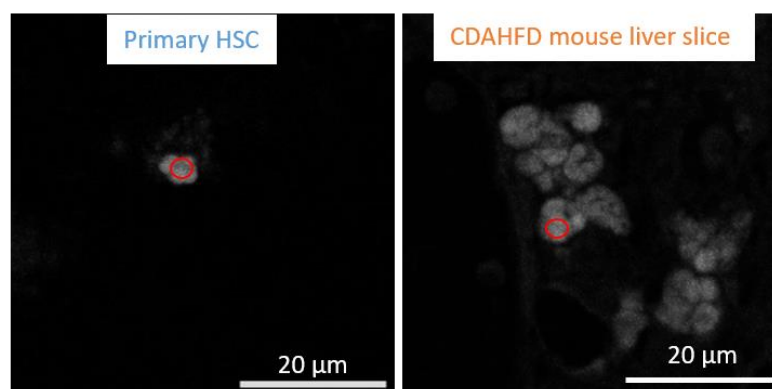

○ ROI of spectral analysis

**Supplementary Figure S1. Spectral analysis of retinoids in murine primary hepatic stellate cells and mouse liver tissue slice.** A) Microscopic images of murine primary HSC purified from SD-fed mouse under brightfield illumination and fluorescent excitation ( $\lambda_{\text{exc}} = 405 \text{ nm}$ ) exhibiting droplets of retinoids (arrows). B) ROI where the emission spectra of main figure 2F were extracted is represented as a red circle.

## Supplementary Figure S2

A)

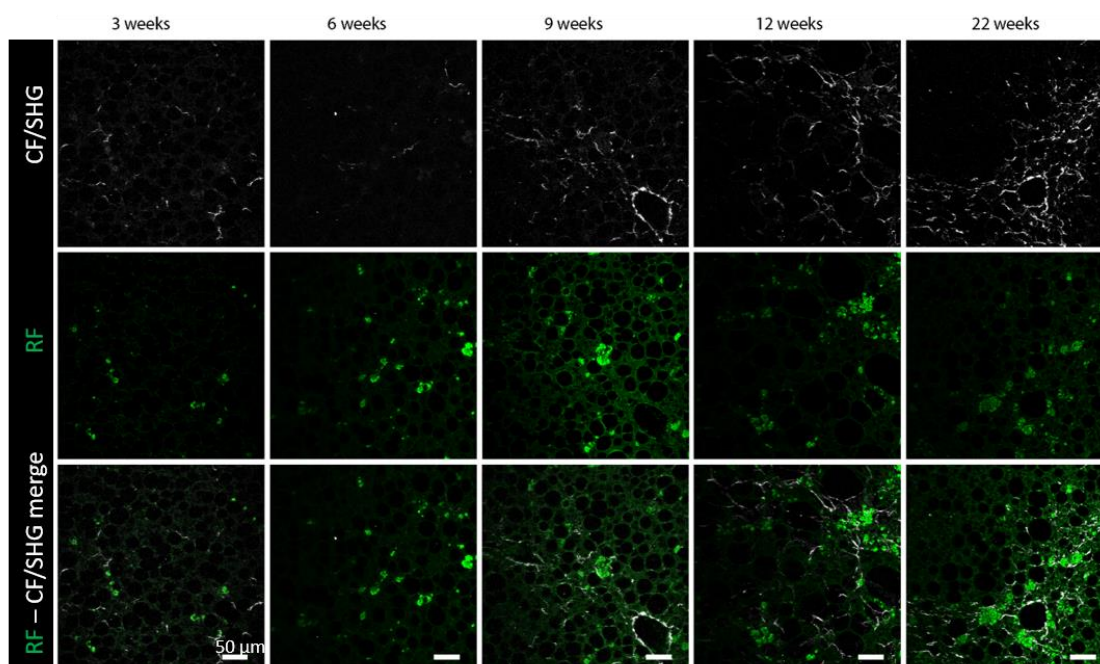

B)

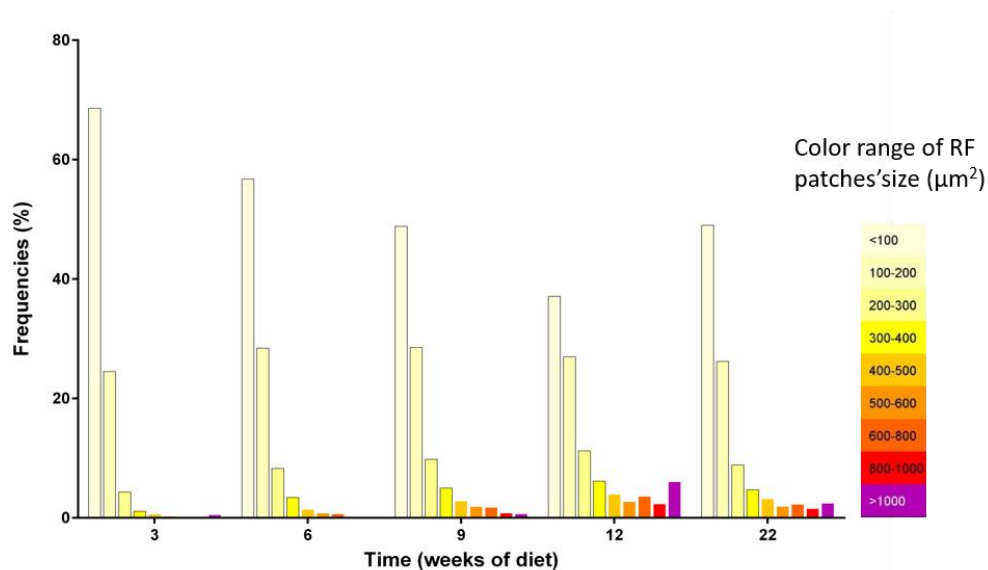

**Supplementary Figure S2. Kinetics of collagen and retinoid accumulation on liver slices of CDAHFD-fed mice as a function of time.** A) Kinetics of collagen and retinoids analyzed by fluorescence microscopy and second harmonic generation microscopy. Representative images of collagen accumulation recorded by second harmonic generation microscopy (CF/SHG signal - top panels) and retinoid fluorescence (RF) signals imaged by fluorescence (middle panels) of mice liver slices after 3, 6, 9, 12 and 22 weeks of CDAHFD. Bottom panel is a merge of the two previous signals. Scale bars: 50 $\mu$ m. B) Kinetics of retinoid accumulation. Frequency histogram of RF patches' size as a function of CDAHFD time. Color range of RF patches' size is expressed in  $\mu$ m<sup>2</sup>.

### Supplementary Figure S3

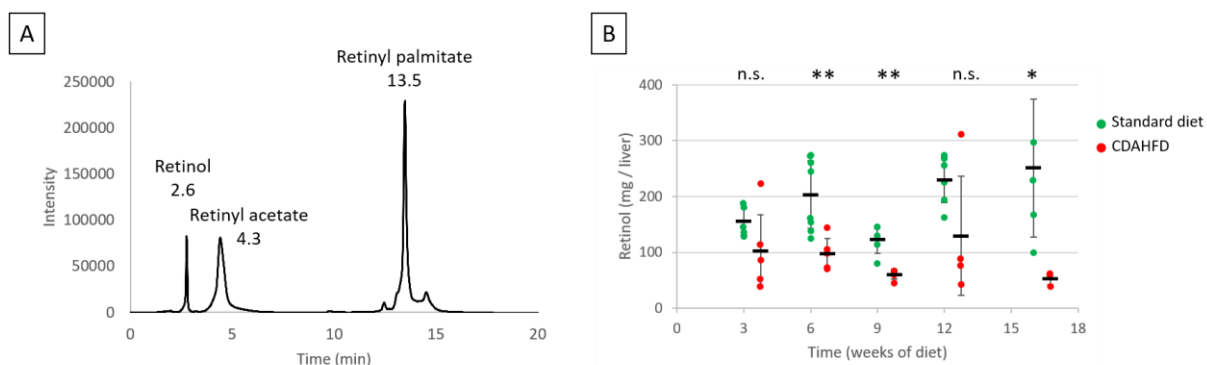

**Supplementary Figure S3. Retinol quantification in liver from SD- and CDAHFD-fed mice by HPLC.** A) Example of HPLC spectrum of mixture of retinoid standards. B) Total liver content in retinol as a function of time in the liver of SD- (green dots) or CDAHFD-fed mice (red dots) (n=4-7 for each condition). Statistic Mann-Whitney compared SD to CDAHFD at a given time, n.s. not significant, \*  $0.010 < p < 0.05$ ; \*\*  $p < 0.010$ .

## Supplementary Figure S4

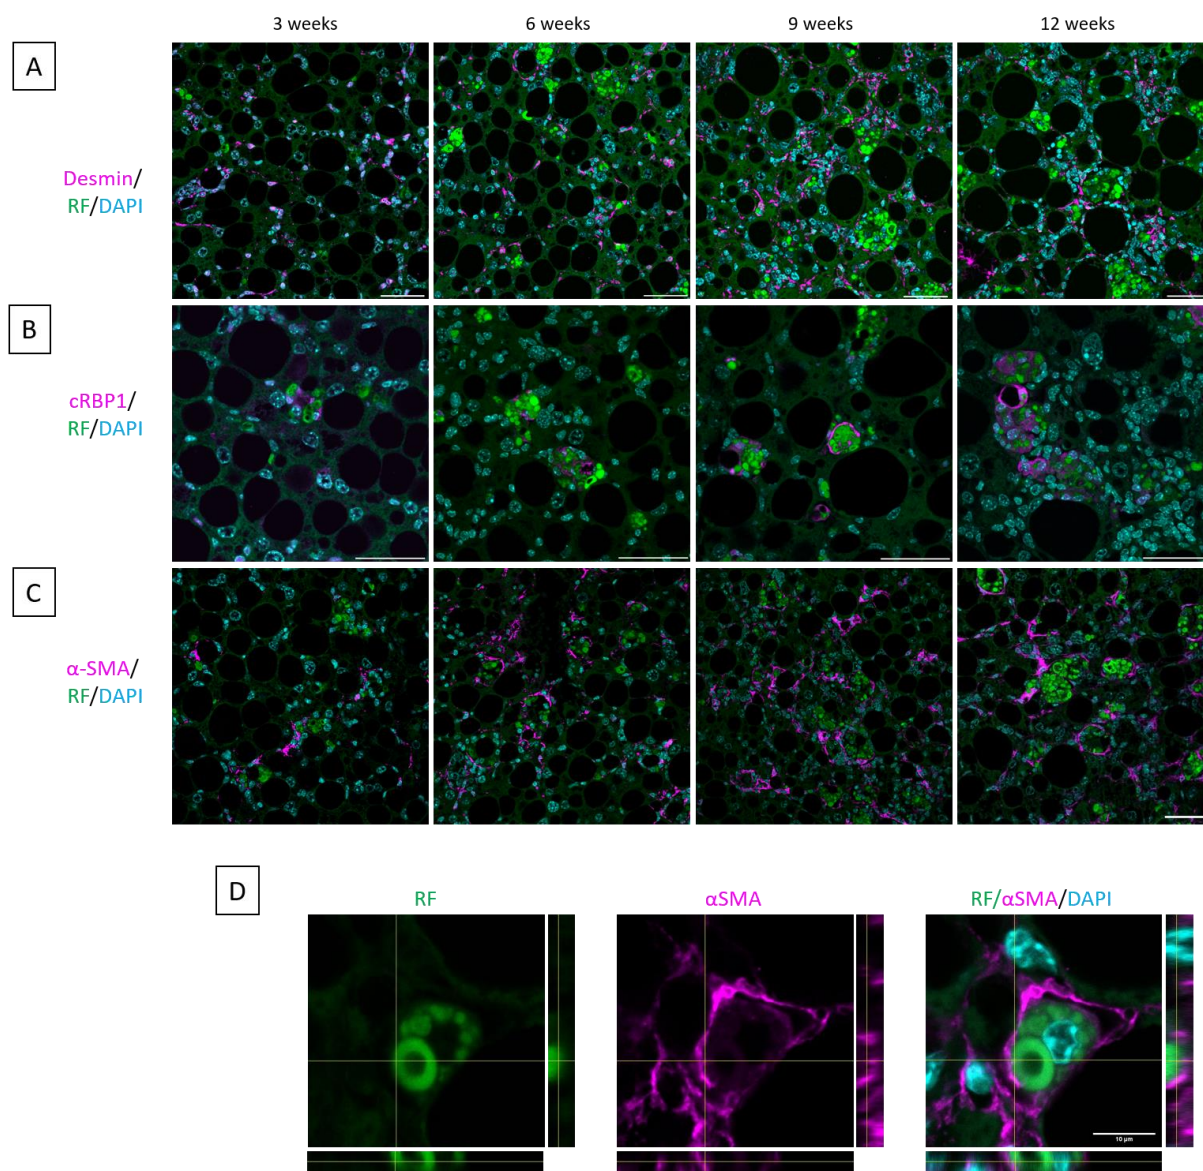

**Supplementary Figure S4. Kinetics of hepatic stellate cells markers evolution on liver slices of CDAHFD-fed mice as a function of time.** A) Desmin, B) cRBP1 and C)  $\alpha$ -SMA labelling of liver slices from CDAHFD-fed mice. Overlap of DAPI, RF (retinoid fluorescence) and A) Desmin, B) cRBP1 and C)  $\alpha$ -SMA signals at 3, 6, 9 and 12 weeks of diet. Scale bars = 50  $\mu$ m. D) Z-stack of  $\alpha$ -SMA immunolabelled CDAHFD-fed mice liver slice allowed the imaging hypertrophied HSC in the third spatial dimension and highlighted the colocation of retinoid fluorescence (RF) droplets (left),  $\alpha$ -SMA (middle). Overlap of DAPI, RF and  $\alpha$ -SMA signals (right). Right panel and bottom panel for each: 4.3  $\mu$ m-width orthogonal view of the Z stack along the yellow lines. Scale bar: 10  $\mu$ m

## Supplementary Figure S5

### A) Histological scores

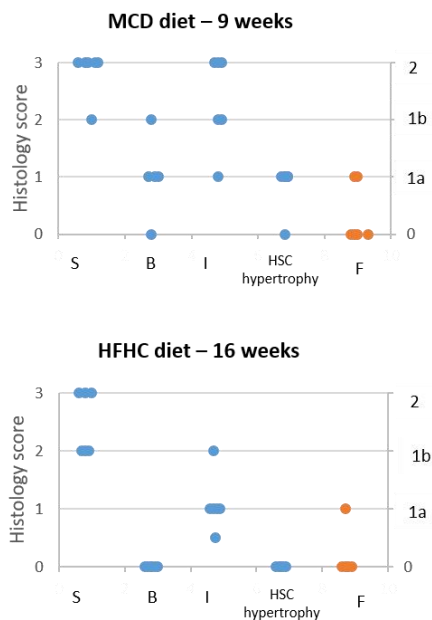

### B) Histological coloration

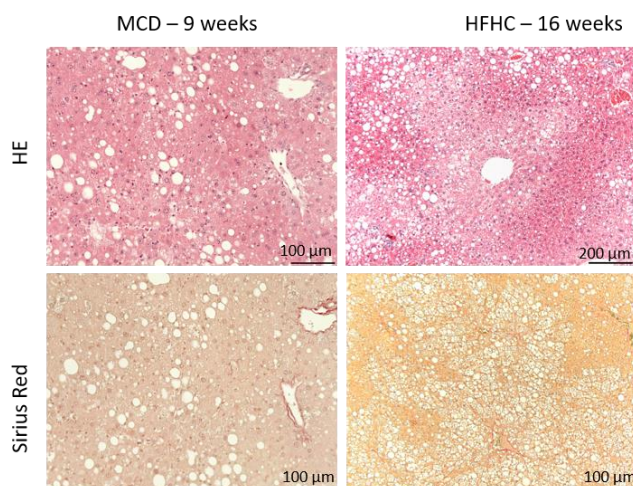

**Supplementary Figure S5. Characterization of other liver fibrosis models.** A) Histology scores after 9 weeks of MCD diet and 16 weeks of HFHC diet for Steatosis (S), Ballooning (B), Inflammation (I), HSC hypertrophy and Fibrosis (F) (n=6). (B) Histological coloration of liver slices of mice submitted to MCD diet for 9 weeks or HFHC diet for 16 weeks. Hematoxylin/Eosin coloration (top panel) and Sirius Red staining (low panel). Scale bars = 100 $\mu$ m.

### Supplementary Table 1

|                                    | Median (range)   |
|------------------------------------|------------------|
| Number of patients                 | 27               |
| Age at surgery in years            | 47 (22-67)       |
| Female (%)                         | 80 %             |
| Male (%)                           | 20 %             |
| BMI                                | 43 (35-52)       |
| Markers                            |                  |
| ALT (UI/L)                         | 34 (14-298)      |
| AST (UI/L)                         | 36 (19-117)      |
| Fibrotest score <sup>1</sup>       | 0.20 (0.03-0.66) |
| HSC hypertrophy score <sup>2</sup> | 1 (0-3)          |

1. Imbert-Bismut F, Ratziu V, Pieroni L, et al. Biochemical markers of liver fibrosis in patients with hepatitis C virus infection: a prospective study. *Lancet*. 2001;357(9262):1069-1075.

2. Established by us and described in the paragraph "HSC hypertrophy is observed in human liver fibrosis" of the results section.

**Supplementary Table 1. Characteristics of patients included in the study.** All patients were part of the same clinical research protocol (FIBROTA, number P100503 –IDRCB 2011-A00759-32 recorded on the clinical trial website (NCT01655017)) that included obese patients who have undergone bariatric surgery during which a liver sample was taken.
